# Supplementary material
Source: Royal Society of Chemistry journal article supplement (doi:10.1039/d6qi00840b)
Supplement: d6qi00840b1.pdf [file d6qi00840b1.pdf]

## Supporting Information

### Demonstration of Low-symmetry Rhombohedral GeTe Single Crystals with Anisotropic Thermoelectric Properties

Siqi Lin<sup>1, #</sup>, Hao Chen<sup>1, #</sup>, Zhenyu Lai<sup>1</sup>, Xiaofei Yue<sup>1</sup>, Yongxian Mu<sup>1</sup>, Xinyue Zhang<sup>2, \*</sup>, Jiye Zhang<sup>2, \*</sup>, Min Jin<sup>1, 2, 3\*</sup>

<sup>1</sup> College of Materials, Shanghai Dianji University, Shanghai 201306, China

<sup>2</sup> School of Materials Science and Engineering, Shanghai University, 99 Shangda Road, Shanghai 200444, China

<sup>3</sup> State Key Laboratory of Functional Crystals and Devices, Shanghai Institute of Ceramics, Chinese Academy of Sciences, 200050, China

\* Email: xinyuezhang@shu.edu.cn (XZ), jychang@shu.edu.cn (JZ), jmaish@aliyun.com (MJ)

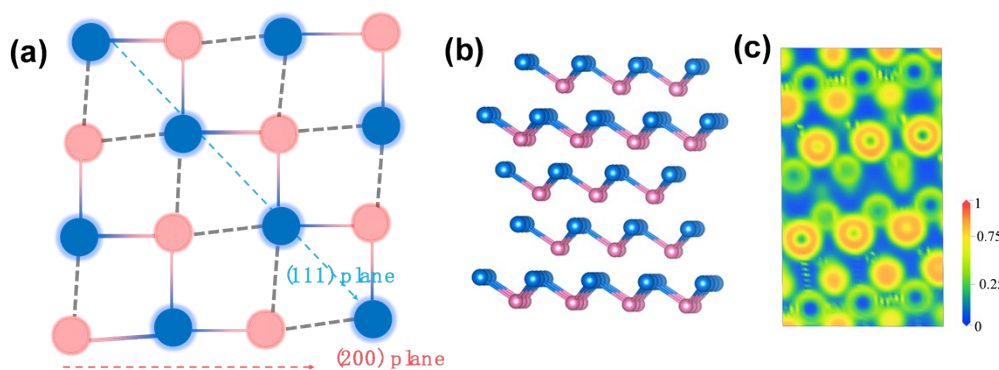

**Figure S1.** (a) Crystal structure of rhombohedral GeTe with distorted Ge-Te bonds, leading to a (b) layered structure. (c) The ELF indicating the weaker chemical bonds between the layers.

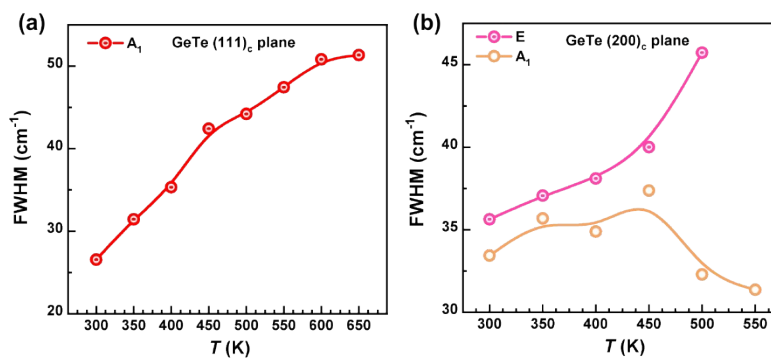

**Figure S2.** Temperature-dependent FWHM of the Raman peaks for GeTe single crystals (a) along (111)<sub>c</sub> plane and (b) along (200)<sub>c</sub> plane.

#### Methods for prediction model:

For a single parabolic band semiconductor with electron scattering by acoustic phonons (SPB-APS), the electrical quality factor  $B_E$  can be expressed using Fermi integrals ( $F_j$ ) as:

$$B_E = S^2 \sigma / [(\frac{2F_1}{F_0} - \eta)^2 F_0] \text{ with } F_j = \int_0^\infty \frac{\xi^j}{1 + \exp(\xi - \eta)} d\xi, \quad (\text{S1})$$

where  $F_j$  can be determined from the reduced Fermi energy  $\eta$  that can be solved with the measured Seebeck coefficient ( $S$ ) via:

$$S = \frac{k_B}{e} \left( \frac{2F_1}{F_0} - \eta \right) \quad (\text{S2})$$

In addition, conductivity can be written as:

$$\sigma = B_E \left( \frac{e}{k_B} \right)^2 F_0, \quad (\text{S3})$$

and electronic thermal conductivity as:

$$\kappa_E = L \sigma T = B_E \left[ \frac{3F_2}{F_0} - \left( \frac{2F_1}{F_0} \right)^2 \right] F_0 T, \quad (\text{S4})$$

as well as the thermoelectric figure of merit as:

$$zT = \frac{S^2 \sigma T}{\kappa_L + \kappa_E} = \frac{B_E T}{\kappa_L} \frac{\left( \frac{2F_1}{F_0} - \eta \right)^2 F_0}{1 + \frac{B_E T}{\kappa_L} \left[ \frac{3F_2}{F_0} - \left( \frac{2F_1}{F_0} \right)^2 \right]}, \text{ meaning the quality factor } B = \frac{B_E T}{\kappa_L}. \quad (\text{S5})$$

In the above equations,  $k_B$  is Boltzmann constant,  $e$  is electric charge,  $L$  is Lorenz factor and  $\kappa_L$  is lattice thermal conductivity respectively.

An approximate analytical solution of  $B_E$ :<sup>1</sup>

$$B_E = S^2 / \rho \left[ \frac{S_r^2 \exp(2 - S_r)}{1 + \exp[-5(S_r - 1)]} + \frac{S_r \pi^2 / 3}{1 + \exp[5(S_r - 1)]} \right] \quad (\text{S6})$$

Here,  $S_r = \frac{|S|}{k_B/e} = \frac{2F_1}{F_0} - \eta$ . This enables a simple estimation of  $B_E$  using Seebeck coefficient ( $S$ ) and electrical resistivity ( $\rho$ ) at any temperature.

## References:

1. X. Zhang, Z. Bu, X. Shi, Z. Chen, S. Lin, B. Shan, M. Wood, A. H. Snyder, L. Chen, G. J. Snyder and Y. Pei, Electronic quality factor for thermoelectrics, *Sci. Adv.*, 2020, **6**, eabc0726.
